# Supplementary material for: Accuracy and readability of cardiovascular entries on Wikipedia: are they reliable learning resources for medical students?
Source: HighWire-hosted journal article supplement (doi:10.1136/bmjopen-2015-008187), 2015-10-01
Supplement: bmjopen-2015-008187supp1.pdf [file bmjopen-2015-008187supp1.pdf]

| Number | Topic                                        | No of pages | DISCERN Evaluator 1 | DISCERN Evaluator 2 |
|--------|----------------------------------------------|-------------|---------------------|---------------------|
| 1      | Acute pericarditis                           | 5           | 28                  | 28                  |
| 2      | Acute pulmonary edema                        | 6           | 38                  | 38                  |
| 3      | Angina Pectoris                              | 12          | 29                  | 29                  |
| 4      | Aortic aneurysm                              | 7           | 33                  | 34                  |
| 5      | Aortic dissection                            | 13          | 42                  | 41                  |
| 6      | Aortic regurgitation                         | 8           | 31                  | 31                  |
| 7      | Aortic stenosis                              | 10          | 35                  | 32                  |
| 8      | Arterial hypertension                        | 19          | 38                  | 39                  |
| 9      | Atherosclerosis                              | 24          | 38                  | 37                  |
| 10     | Atrial fibrillation                          | 17          | 41                  | 39                  |
| 11     | Atrial flutter                               | 5           | 33                  | 33                  |
| 12     | Atrial septal defect                         | 13          | 33                  | 33                  |
| 13     | Bradyarrhythmias                             | 5           | 30                  | 32                  |
| 14     | Cardiac tamponade                            | 5           | 34                  | 33                  |
| 15     | Cardiomyopathies                             | 5           | 33                  | 32                  |
| 16     | Chest pain                                   | 5           | 32                  | 31                  |
| 17     | Coarctation of the aorta                     | 8           | 32                  | 31                  |
| 18     | Complete transposition of the great arteries | 10          | 32                  | 32                  |
| 19     | Cyanosis                                     | 4           | 36                  | 37                  |
| 20     | Deep vein thrombosis                         | 21          | 45                  | 45                  |
| 21     | Dyspnea                                      | 8           | 33                  | 34                  |
| 22     | Eisenmenger syndrome                         | 4           | 35                  | 36                  |
| 23     | Endocarditis                                 | 3           | 32                  | 33                  |
| 24     | Heart failure                                | 20          | 42                  | 42                  |
| 25     | Infective Endocarditis                       | 11          | 34                  | 32                  |
| 26     | Long QT syndrome                             | 10          | 37                  | 38                  |
| 27     | Mitral regurgitation                         | 9           | 34                  | 34                  |
| 28     | Mitral stenosis                              | 7           | 33                  | 32                  |
| 29     | Mitral valve prolapse                        | 8           | 38                  | 38                  |
| 30     | Myocardial Infarction                        | 20          | 38                  | 39                  |
| 31     | Palpitations                                 | 4           | 30                  | 31                  |
| 32     | Patent ductus arteriosus                     | 6           | 34                  | 35                  |
| 33     | Pericardial effusion                         | 4           | 37                  | 35                  |
| 34     | Peripheral arterial disease                  | 9           | 34                  | 31                  |
| 35     | Prosthetic heart valves                      | 10          | 28                  | 28                  |
| 36     | Pulmonary arterial hypertension              | 11          | 35                  | 34                  |
| 37     | Pulmonary embolism                           | 14          | 34                  | 35                  |
| 38     | Pulmonic regurgitation                       | 2           | 28                  | 29                  |
| 39     | Pulmonic Stenosis                            | 2           | 30                  | 30                  |

|    |                                |   |    |    |
|----|--------------------------------|---|----|----|
| 40 | Rheumatic fever                | 8 | 35 | 37 |
| 41 | Syncope                        | 9 | 32 | 33 |
| 42 | Tetralogy of Fallot            | 9 | 35 | 36 |
| 43 | Tricuspid regurgitation        | 3 | 31 | 31 |
| 44 | Tricuspid stenosis             | 2 | 30 | 31 |
| 45 | Ventricular septal defect      | 7 | 38 | 40 |
| 46 | Ventricular tachycardia        | 6 | 32 | 31 |
| 47 | Wolff-Parkinson-White syndrome | 8 | 38 | 38 |

| DISCERN Evaluator 3 | total images and tables | Readability P1 | Readability P2 | Readability P3 | Peer Rev 5yrs | Ref Peer Rev |
|---------------------|-------------------------|----------------|----------------|----------------|---------------|--------------|
| 27                  | 0                       | 12.2           | 12.1           | 13.5           | 0             | 12           |
| 38                  | 3                       | 14             | 15.8           | 16.7           | 4             | 12           |
| 30                  | 0                       | 14.4           | 12.1           | 14.3           | 12            | 31           |
| 32                  | 3                       | 12.6           | 11.5           | 11.6           | 1             | 10           |
| 39                  | 7                       | 10.2           | 12.2           | 14.2           | 3             | 7            |
| 30                  | 1                       | 17.2           | 17.2           | 14.5           | 0             | 9            |
| 33                  | 3                       | 13.6           | 12.1           | 23.4           | 9             | 13           |
| 38                  | 2                       | 13.4           | 14.9           | 14             | 21            | 79           |
| 37                  | 4                       | 18.3           | 16.2           | 14.3           | 14            | 70           |
| 39                  | 1                       | 12.4           | 14.6           | 16.9           | 6             | 42           |
| 32                  | 1                       | 16.6           | 13.9           | 13             | 0             | 2            |
| 32                  | 1                       | 11.6           | 10.7           | 12.8           | 4             | 16           |
| 29                  | 0                       | 9.5            | 10.7           | 11.7           | 0             | 2            |
| 31                  | 1                       | 12.6           | 15.5           | 14             | 0             | 3            |
| 31                  | 2                       | 15.5           | 15.6           | 18.2           | 2             | 6            |
| 33                  | 0                       | 16.6           | 15.1           | 30.2           | 3             | 4            |
| 28                  | 2                       | 12.3           | 13.4           | 11.9           | 2             | 9            |
| 32                  | 4                       | 16.3           | 16.4           | 17.5           | 0             | 0            |
| 38                  | 3                       | 15.4           | 12.9           | 11.7           | 0             | 3            |
| 44                  | 11                      | 13.8           | 11.2           | 11.7           | 53            | 62           |
| 33                  | 0                       | 13.5           | 15.7           | 13.5           | 4             | 12           |
| 34                  | 1                       | 15.8           | 16.1           | 14.5           | 3             | 10           |
| 33                  | 1                       | 15.1           | 14             | 25.9           | 0             | 1            |
| 41                  | 2                       | 15.2           | 13.7           | 11.9           | 4             | 27           |
| 33                  | 2                       | 14.6           | 20.8           | 15.1           | 9             | 27           |
| 38                  | 0                       | 10.4           | 12.5           | 11.3           | 1             | 13           |
| 33                  | 1                       | 14.6           | 14             | 16.6           | 2             | 4            |
| 34                  | 2                       | 13.1           | 14.8           | 13.8           | 2             | 8            |
| 38                  | 2                       | 15.1           | 13.2           | 14.4           | 0             | 15           |
| 39                  | 0                       | 15.9           | 15.8           | 15.1           | 21            | 96           |
| 30                  | 0                       | 13             | 15.7           | 15.8           | 0             | 2            |
| 34                  | 2                       | 10             | 11.6           | 12.5           | 1             | 1            |
| 34                  | 7                       | 13.3           | 16.2           | 16.1           | 0             | 1            |
| 31                  | 1                       | 15.1           | 13.8           | 20.3           | 2             | 22           |
| 28                  | 5                       | 10.9           | 10.1           | 13.5           | 3             | 24           |
| 34                  | 1                       | 14.7           | 14             | 13.1           | 6             | 17           |
| 35                  | 9                       | 11.3           | 12.3           | 10.9           | 9             | 47           |
| 29                  | 0                       | 16.6           | 18.9           | 17.5           | 0             | 0            |
| 28                  | 0                       | 16.4           | 10.4           | 16.4           | 0             | 0            |

|    |   |      |      |      |   |    |
|----|---|------|------|------|---|----|
| 39 | 2 | 13.5 | 13.9 | 15.8 | 1 | 13 |
| 33 | 1 | 12.4 | 14.1 | 12.3 | 4 | 9  |
| 36 | 2 | 13.9 | 13.5 | 15.4 | 1 | 15 |
| 31 | 0 | 14.7 | 16.5 | 14.8 | 0 | 0  |
| 31 | 0 | 14.7 | 14.5 | 14.7 | 0 | 0  |
| 40 | 2 | 14.2 | 13.2 | 10.3 | 0 | 8  |
| 32 | 2 | 13.7 | 12.6 | 16.1 | 6 | 10 |
| 37 | 2 | 14.5 | 14.4 | 14.2 | 1 | 16 |

P1= Upper part  
P2= Middle part  
P3= Bottom part

Peer Rev 5y= Number of peer-re

| Total Ref | Total Edits | Total edits<br>12 months |
|-----------|-------------|--------------------------|
| 13        | 81          | 7                        |
| 17        | 467         | 41                       |
| 48        | 979         | 150                      |
| 11        | 450         | 41                       |
| 11        | 773         | 43                       |
| 14        | 240         | 7                        |
| 25        | 477         | 27                       |
| 102       | 3700        | 100                      |
| 95        | 1699        | 100                      |
| 54        | 1398        | 100                      |
| 6         | 181         | 9                        |
| 29        | 516         | 43                       |
| 10        | 350         | 40                       |
| 11        | 245         | 16                       |
| 11        | 461         | 43                       |
| 9         | 357         | 23                       |
| 17        | 252         | 37                       |
| 1         | 117         | 11                       |
| 7         | 302         | 38                       |
| 127       | 2019        | 94                       |
| 27        | 573         | 22                       |
| 15        | 176         | 34                       |
| 6         | 369         | 8                        |
| 49        | 1617        | 144                      |
| 33        | 192         | 34                       |
| 17        | 517         | 29                       |
| 18        | 709         | 12                       |
| 13        | 211         | 23                       |
| 25        | 517         | 61                       |
| 114       | 3238        | 215                      |
| 6         | 456         | 52                       |
| 5         | 224         | 18                       |
| 3         | 107         | 8                        |
| 31        | 382         | 73                       |
| 25        | 310         | 51                       |
| 30        | 568         | 50                       |
| 56        | 763         | 76                       |
| 2         | 22          | 4                        |
| 2         | 26          | 10                       |

|    |     |    |
|----|-----|----|
| 27 | 846 | 45 |
| 15 | 730 | 92 |
| 28 | 500 | 44 |
| 1  | 64  | 8  |
| 1  | 36  | 2  |
| 11 | 286 | 15 |
| 11 | 222 | 22 |
| 29 | 645 | 50 |

reviewed references published in last 5 years
